# Supplementary material for: Stereoselective phenolic coupling in Blechnum spicant: formation of 8–2′ linked (−)-cis-blechnic, (−)-trans-blechnic and (−)-brainic acids
Source: Royal Society of Chemistry journal article supplement (doi:10.1039/b008174o), 2001-01-01
Supplement: b008174o.doc [file b008174o.doc]

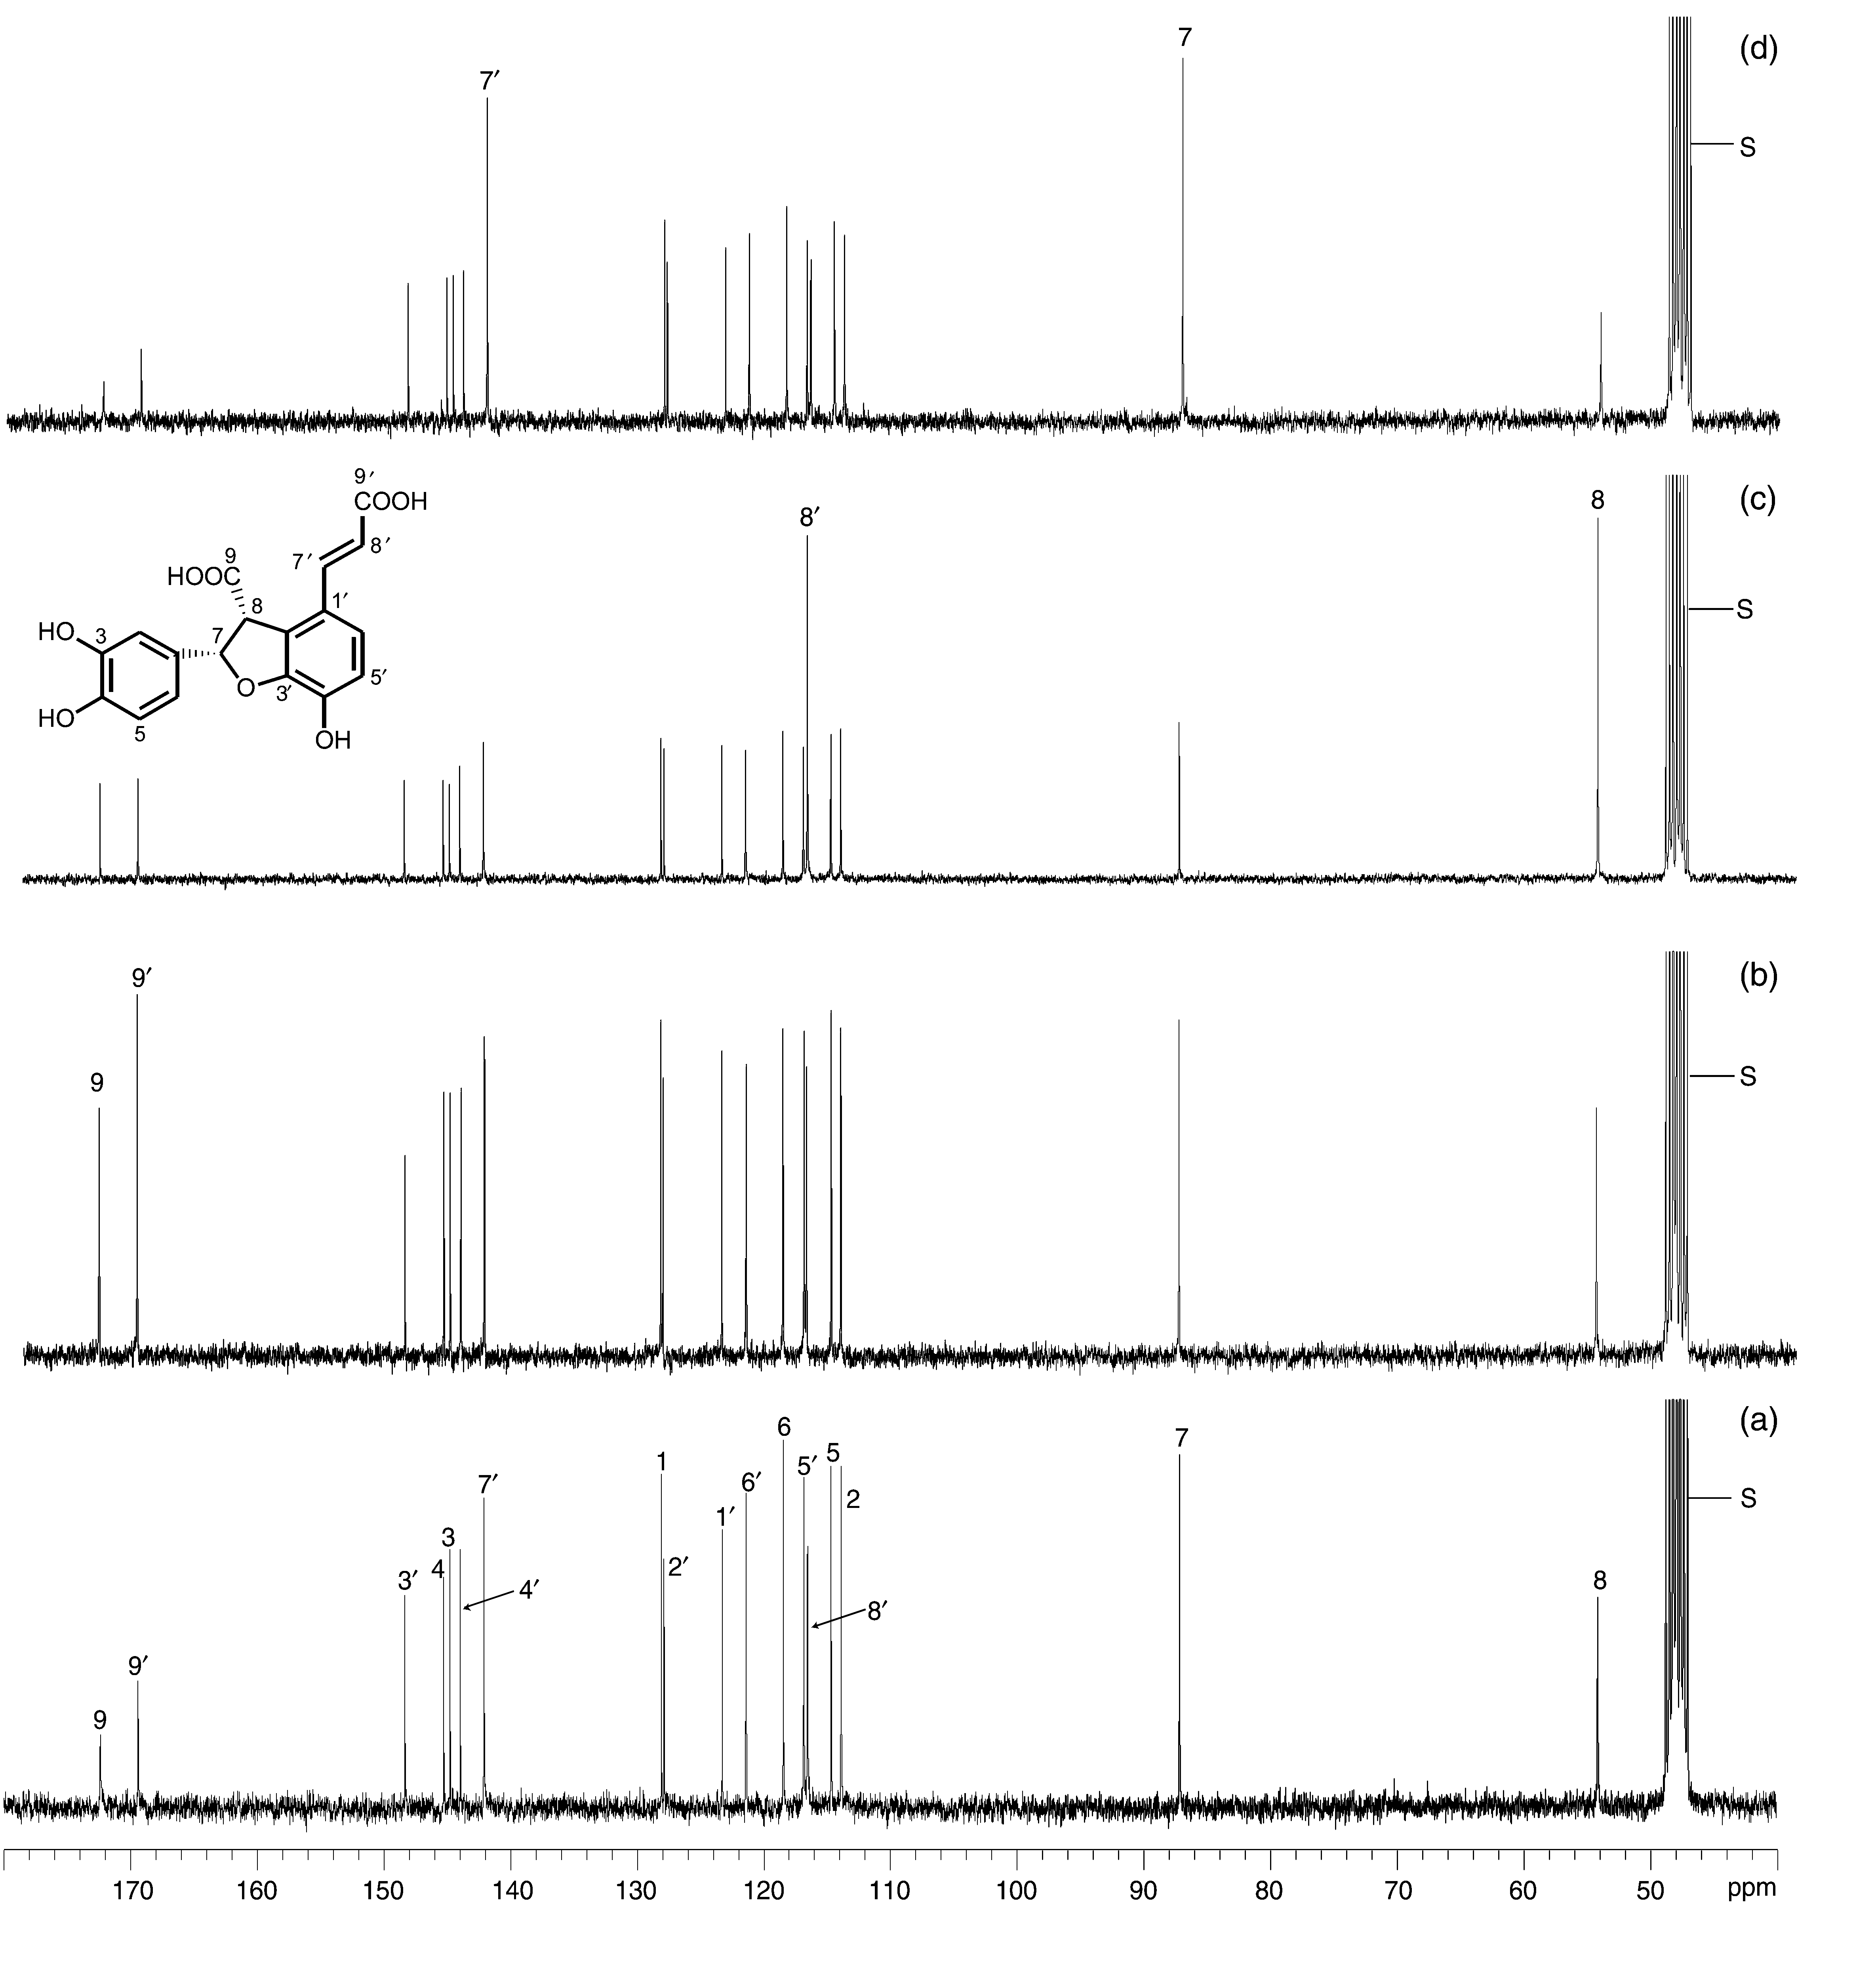


13C-NMR spectra of (a) natural abundance (–)-*trans*-blechnic **1** acid, as well as (–)-*trans*-blechnic acids **1** obtained following administration of (b) [1-13C], (c) [2-13C] and (d) [3-13C]-phenylalanine **6** (1 mM) to *B. spicant* fronds for 5 days; all spectra were recorded under identical conditions.
